# Supplementary material for: Consumption of coffee and tea and risk of developing stroke, dementia, and poststroke dementia: A cohort study in the UK Biobank
Source: PLoS Med. 2021 Nov 16;18(11):e1003830. doi: 10.1371/journal.pmed.1003830 (PMC8594796; doi:10.1371/journal.pmed.1003830)
Supplement: S7 Table — HR, hazard ratio. (DOC) [file pmed.1003830.s009.doc]

**S7 Table.** Hazard ratios (HRs) of stroke and dementia for participants who drank both coffee and tea compared to those who only drank either coffee or tea

| Outcomes | Drinking either coffee or tea | Drinking both coffee and tea | | | | |
| --- | --- | --- | --- | --- | --- | --- |
| HR (95% CI) | Unadjusted  HR (95% CI) | *P* value |  | Multi-adjusted  HR (95% CI)a | *P* value |
| Stroke | 1 (Ref.) | 0.82 (0.78-0.85) | <0.001 |  | 0.89 (0.86-0.93) | <0.001 |
| Ischemic stroke | 1 (Ref.) | 0.81 (0.77-0.86) | <0.001 |  | 0.89 (0.84-0.94) | <0.001 |
| Hemorrhage stroke | 1 (Ref.) | 0.92 (0.83-1.02) | 0.100 |  | 0.96 (0.86-1.06) | 0.378 |
| Dementia | 1 (Ref.) | 0.87 (0.82-0.92) | <0.001 |  | 0.92 (0.87-0.98) | 0.001 |
| Alzheimer disease | 1 (Ref.) | 0.91 (0.83-0.99) | 0.037 |  | 0.95 (0.86-1.04) | 0.249 |
| Vascular dementia | 1 (Ref.) | 0.76 (0.67-0.85) | <0.001 |  | 0.82 (0.72-0.92) | <0.001 |

Abbreviations: CI, confidence interval.

aMultivariable model is adjusted for sex, age, ethnicity (White, Asian or Asian British, Black or Black British, and Other ethnic group), qualification (college or university degree, A levels/AS levels or equivalent, O levels/GCSEs or equivalent, CSEs or equivalent, NVQ or HND or HNC or equivalent, other professional qualifications, or none of the above), income (less than £18,000, 18,000 to 30,999, 31,000 to 51,999, 52,000 to 100,000, and greater than 100,000), BMI (<25, 25 to <30, 30 to <35, and ≥35 kg/m2), smoking status (never, former, current), alcohol status (never, former, and current), physical activity (low, moderate, and high), diet pattern (health and unhealth, created by fruits, vegetables, fish, processed meats, unprocessed red meats, whole grains, refined grains), consumption of sugar-sweetened beverages, tea intake, HDL, LDL, cancer, diabetes, CAD, and hypertension.
