# Supplementary material for: Consumption of coffee and tea and risk of developing stroke, dementia, and poststroke dementia: A cohort study in the UK Biobank
Source: PLoS Med. 2021 Nov 16;18(11):e1003830. doi: 10.1371/journal.pmed.1003830 (PMC8594796; doi:10.1371/journal.pmed.1003830)
Supplement: S31 Table — (DOC) [file pmed.1003830.s033.doc]

**S31 Table.** Association of coffee and tea with stroke in the UK Biobank cohort (detail adjusting for smoking and alcohol statuses)

| Factors | | HR (95% CI)a | P value |  | HR (95% CI)b | *P* value |
| --- | --- | --- | --- | --- | --- | --- |
| Male vs female | | 1.42 (1.36-1.48) | <0.001 |  | 1.42 (1.36-1.48) | <0.001 |
| Age | | 1.10 (1.09-1.10) | <0.001 |  | 1.10 (1.09-1.10) | <0.001 |
| Income | |  |  |  |  |  |
| Less than £18,000 | | 1.00 (Ref) |  |  | 1.00 (Ref) |  |
| 18,000 to 30,999 | | 0.91 (0.86-0.95) | <0.001 |  | 0.91 (0.87-0.96) | <0.001 |
| 31,000 to 51,999 | | 0.83 (0.78-0.88) | <0.001 |  | 0.84 (0.79-0.89) | <0.001 |
| 52,000 to 100,000 | | 0.76 (0.70-0.82) | <0.001 |  | 0.77 (0.71-0.83) | <0.001 |
| Greater than 100,000 | | 0.71 (0.62-0.82) | <0.001 |  | 0.72 (0.62-0.83) | <0.001 |
| Qualification | |  |  |  |  |  |
| College or University | | 1.00 (Ref) |  |  | 1.00 (Ref) |  |
| A levels/AS levels | | 1.07 (0.99-1.16) | 0.072 |  | 1.07 (0.99-1.15) | 0.090 |
| O levels/GCSEs | | 1.06 (1.00-1.13) | 0.061 |  | 1.06 (0.99-1.12) | 0.084 |
| CSEs or equivalent | | 1.17 (1.04-1.31) | 0.009 |  | 1.16 (1.03-1.30) | 0.013 |
| NVQ or HND or HNC | | 1.05 (0.97-1.14) | 0.248 |  | 1.04 (0.96-1.13) | 0.322 |
| None of the above | | 1.12 (1.06-1.19) | <0.001 |  | 1.11 (1.05-1.18) | <0.001 |
| Ethnicity | |  |  |  |  |  |
| White | | 1.00 (Ref) |  |  | 1.00 (Ref) |  |
| Asian or Asian British | | 0.98 (0.70-1.37) | 0.915 |  | 0.99 (0.71-1.38) | 0.943 |
| Black or Black British | | 1.69 (1.45-1.96) | <0.001 |  | 1.71 (1.47-1.99) | <0.001 |
| Other ethnic group | | 1.04 (0.84-1.29) | 0.723 |  | 1.04 (0.84-1.30) | 0.701 |
| Physical activity | |  |  |  |  |  |
| Low | | 1.00 (Ref) |  |  | 1.00 (Ref) |  |
| Moderate | | 0.90 (0.85-0.95) | <0.001 |  | 0.90 (0.86-0.95) | <0.001 |
| High | | 0.95 (0.90-1.01) | 0.091 |  | 0.96 (0.91-1.01) | 0.130 |
| BMI (kg/m2) | |  |  |  |  |  |
| <25 | | 1.00 (Ref) |  |  | 1.00 (Ref) |  |
| 25 to <30 | | 0.98 (0.94-1.03) | 0.518 |  | 0.99 (0.94-1.04) | 0.595 |
| 30 to <35 | | 1.01 (0.95-1.08) | 0.681 |  | 1.01 (0.96-1.08) | 0.628 |
| ≥35 | | 1.12 (1.03-1.21) | 0.005 |  | 1.12 (1.03-1.21) | 0.006 |
| HDL | | 0.97 (0.91-1.04) | 0.417 |  | 0.98 (0.91-1.05) | 0.501 |
| LDL | | 1.00 (0.98-1.03) | 0.937 |  | 1.00 (0.98-1.03) | 0.958 |
| Health diet | | 0.96 (0.92-1.00) | 0.074 |  | 0.97 (0.93-1.01) | 0.128 |
| Consumption of  sugar-sweetened beverages | | 0.97 (0.92-1.02) | 0.178 |  | 0.96 (0.92-1.01) | 0.146 |
| Diabetes | |  |  |  |  |  |
| No | | 1.00 (Ref) |  |  | 1.00 (Ref) |  |
| Yes | | 1.55 (1.46-1.65) | <0.001 |  | 1.55 (1.45-1.64) | <0.001 |
| Cancer | |  |  |  |  |  |
| No | | 1.00 (Ref) |  |  | 1.00 (Ref) |  |
| Yes | | 1.18 (1.11-1.26) | <0.001 |  | 1.18 (1.11-1.26) | <0.001 |
| CAD | |  |  |  |  |  |
| No | | 1.00 (Ref) |  |  | 1.00 (Ref) |  |
| Yes | | 1.61 (1.51-1.72) | <0.001 |  | 1.61 (1.51-1.72) | <0.001 |
| Hypertension | |  |  |  |  |  |
| No | | 1.00 (Ref) |  |  | 1.00 (Ref) |  |
| Yes | | 1.41 (1.35-1.47) | <0.001 |  | 1.40 (1.35-1.46) | <0.001 |
| Coffee (cups/d) | Tea (cups/d) |  |  |  |  |  |
| 0 0 | | 1.00 (Ref) |  |  | 1.00 (Ref) |  |
| 0 0.5-1 | | 0.87 (0.69-1.11) | 0.263 |  | 0.87 (0.69-1.11) | 0.261 |
| 0 2-3 | | 0.77 (0.65-0.90) | 0.002 |  | 0.77 (0.66-0.91) | 0.002 |
| 0 ≥4 | | 0.78 (0.67-0.89) | <0.001 |  | 0.77 (0.67-0.89) | <0.001 |
| 0.5-1 0 | | 1.00 (0.82-1.23) | 0.980 |  | 1.00 (0.82-1.23) | 0.974 |
| 0.5-1 0.5-1 | | 0.93 (0.77-1.11) | 0.407 |  | 0.93 (0.78-1.12) | 0.441 |
| 0.5-1 2-3 | | 0.73 (0.63-0.85) | <0.001 |  | 0.74 (0.64-0.86) | <0.001 |
| 0.5-1 ≥4 | | 0.66 (0.57-0.76) | <0.001 |  | 0.66 (0.57-0.76) | <0.001 |
| 2-3 0 | | 0.79 (0.67-0.93) | 0.005 |  | 0.79 (0.67-0.93) | 0.005 |
| 2-3 0.5-1 | | 0.80 (0.67-0.94) | 0.007 |  | 0.80 (0.68-0.94) | 0.008 |
| 2-3 2-3 | | 0.68 (0.59-0.79) | <0.001 |  | 0.69 (0.59-0.79) | <0.001 |
| 2-3 ≥4 | | 0.70 (0.61-0.82) | <0.001 |  | 0.71 (0.61-0.82) | <0.001 |
| ≥4 0 | | 0.82 (0.70-0.95) | 0.008 |  | 0.81 (0.69-0.94) | 0.005 |
| ≥4 0.5-1 | | 0.74 (0.63-0.88) | 0.001 |  | 0.74 (0.63-0.88) | 0.001 |
| ≥4 2-3 | | 0.69 (0.59-0.82) | <0.001 |  | 0.69 (0.59-0.82) | <0.001 |
| ≥4 ≥4 | | 0.83 (0.71-0.98) | 0.025 |  | 0.83 (0.71-0.97) | 0.023 |
| Smoking status | |  |  |  |  |  |
| Never | | 1.00 (Ref) |  |  | 1.00 (Ref) |  |
| former smokers who have  quit > 5 years | | 1.05 (1.00-1.10) | 0.032 |  | 1.05 (1.00-1.10) | 0.059 |
| Former smokers who have  ≤5 years | |  |  |  | 1.04 (0.98-1.11) | 0.157 |
| Current <10 cigarettes/day | | 1.75 (1.64-1.86) | <0.001 |  | 1.66 (1.42-1.94) | <0.001 |
| Current 10–20 cigarettes/day | |  |  |  | 1.80 (1.63-1.99) | <0.001 |
| Current 20+ cigarettes/day | |  |  |  | 2.24 (2.04-2.47) | <0.001 |
| Alcohol status | |  |  |  |  |  |
| Never | | 1.00 (Ref) |  |  | 1.00 (Ref) |  |
| Former | | 1.04 (0.92-1.17) | 0.537 |  | 1.03 (0.92-1.16) | 0.614 |
| Current <7 g/day | | 0.81 (0.75-0.89) | <0.001 |  | 0.83 (0.76-0.91) | <0.001 |
| Current 7-16 g/day | |  |  |  | 0.77 (0.70-0.84) | <0.001 |
| Current >16 g/day | |  |  |  | 0.83 (0.64-1.08) | 0.174 |

aMultivariable model is adjusted for age, ethnicity (White, Asian or Asian British, Black or Black British, and Other ethnic group), qualification (college or university degree, A levels/AS levels or equivalent, O levels/GCSEs or equivalent, CSEs or equivalent, NVQ or HND or HNC or equivalent, other professional qualifications, or none of the above), income (less than £18,000, 18,000 to 30,999, 31,000 to 51,999, 52,000 to 100,000, and greater than 100,000), BMI (<25, 25 to <30, 30 to <35, and ≥35 kg/m2), physical activity (low, moderate, and high), diet pattern (health and unhealth, created by fruits, vegetables, fish, processed meats, unprocessed red meats, whole grains, refined grains), consumption of sugar-sweetened beverages, HDL, LDL, cancer, diabetes, CAD, hypertension, smoking status (never, former, current), and alcohol status (never, former, and current).

bMultivariable model is adjusted for age, ethnicity (White, Asian or Asian British, Black or Black British, and Other ethnic group), qualification (college or university degree, A levels/AS levels or equivalent, O levels/GCSEs or equivalent, CSEs or equivalent, NVQ or HND or HNC or equivalent, other professional qualifications, or none of the above), income (less than £18,000, 18,000 to 30,999, 31,000 to 51,999, 52,000 to 100,000, and greater than 100,000), BMI (<25, 25 to <30, 30 to <35, and ≥35 kg/m2), physical activity (low, moderate, and high), diet pattern (health and unhealth, created by fruits, vegetables, fish, processed meats, unprocessed red meats, whole grains, refined grains), consumption of sugar-sweetened beverages, HDL, LDL, cancer, diabetes, CAD, hypertension, smoking status (never smokers, former smokers who have quit >5 years ago, former smokers who have quit ≤ 5 years, current smokers <10 cigarettes per day, current smokers 10–20 cigarettes per day, and current smokers 20+ cigarettes per day), and alcohol status (never drinkers, former drinkers, current drinkers <7g per day, current drinkers 7-16 g per day, and current drinkers >16 g per day).
